# Supplementary material
Source: HighWire-hosted journal article supplement (https://www.cmajopen.ca/highwire/filestream/81177/field_highwire_adjunct_files/1/2017-0097-Original_submission.pdf)
Supplement: 2017-0097-Original_submission.pdf [file 2017-0097-Original_submission.pdf]

1  
2  
3 **Title:** Patient characteristics, resource utilization, and outcomes associated with general  
4 internal medicine hospital care – The General Medicine Inpatient Initiative Study  
5 (GEMINI)  
6

7  
8 **Authors:**

9 Amol A Verma MD, MPhil, Li Ka Shing Centre for Healthcare Analytics Research and  
10 Training, St. Michael's Hospital, Elliot Phillipson Clinician-Scientist Training Program,  
11 Department of Medicine, University of Toronto; 30 Bond Street, Toronto, ON, Canada  
12 M5B 1W8, Tel: (416) 864-6060 x76934, Fax: (416) 864-5904,  
13 [amol.verma@mail.utoronto.ca](mailto:amol.verma@mail.utoronto.ca) (Corresponding Author)  
14  
15

16 Yishan Guo, MSc, Li Ka Shing Knowledge institute, St. Michael's Hospital, Toronto.  
17

18 Janice L Kwan, MD, MPH, Department of Medicine, Sinai Health System, Department  
19 of Medicine, University of Toronto.  
20

21 Lauren Lapointe-Shaw, MD, Department of Medicine, University of Toronto.  
22

23 Shail Rawal MD, MPH, Division of General Internal Medicine, University Health  
24 Network, Department of Medicine, University of Toronto.  
25

26 Terence Tang, MD, Institute for Better Health, Trillium Health Partners, Department of  
27 Medicine, University of Toronto.  
28

29 Adina Weirnerman, MD, MHSc, Sunnybrook Health Sciences Centre, Department of  
30 Medicine, University of Toronto.  
31

32 Peter Cram, MD, MBA, University Health Network, Sinai Health System, University of  
33 Toronto.  
34

35 Irfan A. Dhalla, MD, MSc, St. Michael's Hospital, Health Quality Ontario, University of  
36 Toronto.  
37

38 Stephen W. Hwang, MD, MPH, St. Michael's Hospital, University of Toronto.  
39

40 Andreas Laupacis, MD, MSc, St. Michael's Hospital, University of Toronto.  
41

42 Muhammad Mamdani, PharmD, MPH, St. Michael's Hospital, University of Toronto.  
43

44 Steven Shadowitz, MDCM, MSc, Sunnybrook Health Sciences Centre, University of  
45 Toronto.  
46

47 Ross Upshur, MD, MA, MSc, Bridgepoint Health, University of Toronto.  
48

49 Robert J. Reid, MD, PhD, Institute for Better Health, Trillium Health Partners, University  
50 of Toronto.  
51

52 Fahad Razak, MD, MSc, Li Ka Shing Knowledge institute; Harvard Center for  
53 Population and Development Studies; St Michael's Hospital, University of Toronto.  
54  
55  
56  
57  
58  
59  
60

1  
2  
3 **Word Count:** 3100 words  
4

5  
6 **Funding:** GEMINI was supported by grants from Green Shield Canada Foundation and  
7 the University of Toronto Division of General Internal Medicine. Dr. Cram is supported  
8 by a K24 AR062133 award from NIAMS at the NIH  
9

10 **Disclosures:** Dr. Mamdani has served on the following advisory boards and reports  
11 personal fees from Bristol-Myers Squibb, Eli Lilly and Company, Glaxo Smith Kline,  
12 Hoffman La Roche, Novartis, Novo Nordisk, Pfizer, and Astra Zeneca, outside of the  
13 submitted work.  
14

15  
16  
17 **Acknowledgments:** For their contributions to data collection and study design, we  
18 would like to acknowledge Dr. William Coke, Trillium Health Partners, Dr. Wannudee  
19 Isaranuwachai, St. Michael's Hospital and University of Toronto, and Mr. Christopher  
20 Ducharme, St. Michael's Hospital.  
21  
22

23  
24  
25  
26  
27  
28  
29  
30  
31  
32  
33  
34  
35  
36  
37  
38  
39  
40  
41  
42  
43  
44  
45  
46  
47  
48  
49  
50  
51  
52  
53  
54  
55  
56  
57  
58  
59  
60

Confidential

## Abstract

**Background:** The purpose of this study was to describe hospitalized general internal medicine (GIM) patients and their care at 7 hospital sites in the Greater Toronto Area, Canada.

**Methods:** This was a retrospective study involving all patients who were admitted to or discharged from GIM at study sites between April 1, 2010 and March 31, 2015. Clinical data from hospital electronic information systems were linked to administrative data from each hospital. We examined patient demographics, medical conditions, outcomes, and resource utilization.

**Results:** There were 136,208 hospitalizations to GIM, accounting for 38.8% of all admissions from the emergency department and 23.7% of all hospital bed-days. Over the five-year study period, the number of GIM hospitalizations per year increased by 32.4% with no meaningful change in the average length-of-stay or cost per hospitalization. The median age was 73 years (IQR 57-84) and the median number of comorbidities was 6 (IQR 3-9). The median acute length-of-stay was 4.6 days (IQR 2.5-8.6) and median total cost per hospitalization was \$5,850 (IQR \$3,915-10,061). Patients received at least one CT scan in 52.2% of hospitalizations. The most common primary discharge diagnoses were pneumonia (5.0%), heart failure (4.7%), chronic obstructive pulmonary disease (4.1%), urinary tract infection (4.0%), and stroke (3.6%). The ten most common diagnoses accounted for only 33.0% of all hospitalizations and the remainder included 439 different conditions.

1  
2  
3  
4  
5  
6  
7  
8  
9  
10  
11  
12  
13  
14  
15  
16  
17  
18  
19  
20  
21  
22  
23  
24  
25  
26  
27  
28  
29  
30  
31  
32  
33  
34  
35  
36  
37  
38  
39  
40  
41  
42  
43  
44  
45  
46  
47  
48  
49  
50  
51  
52  
53  
54  
55  
56  
57  
58  
59  
60

**Interpretation:** GIM hospital patients represent a large, heterogeneous, resource-intensive, and growing population. Understanding and improving GIM care is essential to promote a high quality and sustainable healthcare system.

Confidential

## Introduction

Hospital care accounts for 30% of healthcare expenditure in Canada, making it the largest contributor to healthcare costs.(1) There has been a well-described growth in inpatient medical care by hospitalist physicians,(2) the majority of whom are not subspecialists but general internists and family physicians.(3) This care is often organized and delivered under a general internal medicine (GIM) service. An aging population, a growing number of patients with multiple chronic conditions,(4,5) and patients presenting with undifferentiated problems has resulted in more hospital patients whose care falls outside of clearly delineated subspecialty areas. Thus, better understanding GIM hospital patients is increasingly important.

Relatively little research has focused on the characteristics of GIM hospital patients or the quality of care that they receive. The proportion of hospital resources devoted to GIM patients in Canada has not been reported. Studies examining medical care in hospital typically include all medical admissions regardless of whether patients are cared for by a general or subspecialty service(6,7) or include only patients with specific diseases, such as heart failure, myocardial infarction, and pneumonia.(8)

Thus, the precise scope of GIM hospital care remains poorly quantified. Given that GIM services likely care for a large and growing inpatient population, the purpose of this study was to characterize GIM inpatients with respect to demographics, medical conditions, health outcomes, and resource utilization at 7 hospital sites in the Greater Toronto Area, Ontario, Canada. This is an essential first step toward improving the quality and sustainability of GIM care, which is relevant for health systems caring for aging populations around the world.(5)

## Methods

### Design and Setting

The General Medicine Inpatient Initiative Study (GEMINI) is a retrospective study involving 7 large hospital sites at 5 healthcare organizations affiliated with the University of Toronto serving adults in the Greater Toronto Area. Participating sites are St. Michael's Hospital, Sinai Health System (Mount Sinai Hospital), Sunnybrook Health Sciences Centre, Trillium Health Partners (Credit Valley and Mississauga sites), and the University Health Network (Toronto General Hospital and Toronto Western Hospital).

Trillium Health Partners is a large community teaching hospital serving the neighbouring city of Mississauga (population 756,000).(9) The remaining GEMINI hospitals are academic health centres in the city of Toronto (population 2,790,000).(10) Each healthcare organization participating in GEMINI is independent with distinct governance, funding, administration, staff, and information technology systems. Medical students and residents from the University of Toronto rotate between the different GEMINI hospitals.

### Participants

The GEMINI cohort included all patients who were admitted to or discharged from the GIM service over a 5-year period between April 1, 2010 and March 31, 2015 (further details described in Appendix Methods 1). Based on these inclusion criteria, patients who were transiently cared for by the GIM service but were admitted and discharged by another hospital service were not included in the cohort. There were no exclusion criteria.

1  
2  
3 The GIM service includes hospitalist services as well as clinical teaching units that  
4 are approved by the Royal College of Physicians and Surgeons of Canada and involve  
5 undergraduate and post-graduate medical trainees as described in Appendix Methods  
6  
7  
8  
9  
10  
11 2. Across the participating sites, there were 283 attending physicians in GIM, 92.6% of  
12 whom were general internists or internal medicine subspecialists and 7.4% were family  
13 physicians.  
14  
15  
16

### 17 Data Collection

18  
19  
20 At the individual patient level, we linked standardized administrative health data with  
21 clinical data that was extracted from hospital information systems (Appendix Figure 1).  
22  
23 Data were collected locally at each hospital, deidentified, and transferred to St.  
24 Michael's Hospital, where they are stored securely on firewall-protected hospital  
25 servers. A secure hash algorithm using patient health insurance number was used to  
26 track deidentified patients across sites.(11,12) There were 1,678 hospitalizations with  
27 no health insurance number. They could not be tracked across sites and each was  
28 considered a unique patient.  
29  
30  
31  
32  
33  
34  
35  
36  
37

### 38 *Administrative Health Data*

39  
40 We collected patient-level characteristics including demographics, diagnoses,  
41 interventions, discharge destination, and resource utilization as reported by participating  
42 hospitals to the CIHI Discharge Abstract Database (DAD) and National Ambulatory  
43 Care Reporting System (NACRS). The CIHI DAD and NACRS contain these data for all  
44 hospital discharges and emergency department encounters, respectively. Data  
45 regarding diagnoses and interventions are coded manually by hospital-based chart  
46 abstractors using the enhanced Canadian version of the 10<sup>th</sup> revision of the  
47  
48  
49  
50  
51  
52  
53  
54  
55  
56  
57  
58  
59  
60

1  
2  
3 International Statistical Classification of Diseases and Related Health Problems (ICD-  
4 10-CA) and the Canadian Classification of Health Interventions (CCI). Data from CIHI  
5  
6 have formed the basis for a substantial body of clinical and health services  
7  
8 research.(13–15) We also obtained data about overall hospital patient volumes and bed  
9  
10 utilization from the decision support department of each hospital.  
11  
12  
13

### 14 *Electronic Clinical Data*

15  
16 We collected data from the electronic information systems at each hospital about in-  
17  
18 hospital patient room transfers, laboratory (biochemistry, hematology, and microbiology)  
19  
20 test results, blood transfusions, radiology test results, electrocardiograms and  
21  
22 echocardiography, in-hospital medications, dietary orders, vital signs and routine clinical  
23  
24 monitoring. Appendix Table 1 describes which data elements could be extracted from  
25  
26 each site.  
27  
28  
29

30  
31 Data were extracted at each hospital into comma-separated values (CSV) files. To  
32  
33 allow for site-specific differences in data extraction and results formats, an ideal data  
34  
35 format and table structure was provided to each hospital to populate. Where possible,  
36  
37 standardized data elements were used, such as Drug Identification Number (DIN) for  
38  
39 pharmacy data. Where existing standards were not uniformly applied, for example with  
40  
41 laboratory data, the available data were extracted at each site and centrally mapped to  
42  
43 a common format.  
44  
45  
46

47  
48 Research Ethics Board approval was obtained from all participating hospitals.  
49  
50 Waivers of informed consent were obtained because this was a large retrospective  
51  
52 study with minimal risk.  
53  
54

### 55 Measures and Statistical Analysis



1  
2  
3 We described demographics, coexisting medical conditions, patient outcomes, and  
4 resource utilization among all GIM hospitalizations and for each of the most prevalent  
5 discharge diagnoses. To examine coexisting conditions, we used 3-character ICD-10-  
6 CA codes from the CIHI DAD Database for each hospitalization. We calculated both a  
7 simple count of all coexisting conditions and the revised Charlson comorbidity  
8 score.<sup>(16)</sup> To describe patient outcomes, we reported utilization of the intensive care  
9 unit (ICU), in-hospital death, and readmission to GIM at one of the GEMINI hospitals  
10 within 30 days of discharge.  
11  
12

13  
14  
15 Acute inpatient length-of-stay was calculated by subtracting the number of days  
16 spent at an 'Alternate Level of Care' (ALC) from total hospital length-of-stay. ALC is a  
17 designation given in Canadian hospitals for patients who no longer require acute care  
18 but are awaiting transfer to a different care level, such as a rehabilitation facility. We  
19 also considered transfer to inpatient palliative care within the same facility as discharge  
20 from acute care.  
21  
22

23  
24  
25 In order to estimate hospitalization costs such that they could be compared across  
26 study sites and years, we used the CIHI Resource Intensity Weight for each admission  
27 using the 2015 grouping methodology and multiplied this by the annual cost per  
28 weighted case for acute inpatient cases that was reported for each hospital using the  
29 Ontario Cost Distribution Methodology.<sup>(17)</sup> This approach estimates the average  
30 amount of hospital resources used for each hospitalization, including costs related to  
31 administration, staff, supplies, technology, and equipment. It does not include fee-for-  
32 service physician billing costs. To determine the proportion of hospital costs attributable  
33  
34  
35  
36  
37  
38  
39  
40  
41  
42  
43  
44  
45  
46  
47  
48  
49  
50  
51  
52  
53  
54  
55  
56  
57  
58  
59  
60

1  
2  
3 to GIM patients, standardized data about overall hospital costs were obtained from the  
4  
5 Ontario Ministry of Health and Long-Term Care Health Data Branch.  
6  
7

8 We used electronic clinical data to describe the proportion of patients receiving at  
9  
10 least one of each imaging test (X-ray, CT scan, ultrasonography, or MRI) and at least  
11  
12 one red blood cell transfusion. We used CCI codes to describe the number of patients  
13  
14 receiving dialysis, endoscopy, or bronchoscopy.  
15  
16

17 To determine the proportion of hospital resources that were used by GIM patients, we  
18  
19 compared the number of hospitalizations, admissions to hospital from the emergency  
20  
21 department (which we refer to as 'emergency admissions'), and total bed-days for  
22  
23 patients in the GEMINI cohort to overall hospital values (Appendix Methods 3).  
24  
25  
26

27 We identified the most prevalent primary discharge diagnoses in GIM using 2015  
28  
29 CIHI case mix groups (CMGs). Every acute inpatient discharge is classified into a single  
30  
31 CMG through the CIHI CMG+ methodology, which is based on the most responsible  
32  
33 diagnosis and interventions received in hospital.(18) Because there are different  
34  
35 methods of categorizing ICD-10-CA codes into clinically similar conditions, we tested  
36  
37 the validity of our findings by comparing the sensitivity and specificity of the CIHI CMGs  
38  
39 against existing validated cohort definitions for the five most prevalent conditions.(19–  
40  
41  
42  
43  
44 24)

45 We described changes in resource utilization in GIM over the five-year study period  
46  
47 by examining the annual number of hospitalizations, the GIM proportion of total  
48  
49 hospitalizations, median cost, median acute length-of-stay, rate of 30-day readmission  
50  
51 to GIM within the GEMINI hospitals, and use of advanced imaging (the proportion of  
52  
53 patients receiving at least one CT, MRI, or ultrasound test). We also described changes  
54  
55  
56  
57  
58  
59  
60

1  
2  
3 in basic patient characteristics during this time: age, sex, comorbidity score, and  
4  
5 number of coexisting medical conditions.  
6  
7

8 Simple descriptive statistics were presented for all findings because we made no pre-  
9  
10 specified hypotheses. All analyses were performed using 'R' version 3.3.2.  
11  
12

## 13 14 15 **Results**

### 16 17 Demographics and Coexisting Medical Coniditions

18  
19 There were 136,208 hospitalizations to GIM services involving 88,121 unique  
20  
21 patients between April 1, 2010 and March 31, 2015 (Table 1). The study population was  
22  
23 50.6% women and the median age was 73 (IQR 57-84). Patients under 60 years  
24  
25 accounted for 28.6% of hospitalizations and patients older than 80 years accounted for  
26  
27 37.6% (Appendix Figure 2).  
28  
29

30  
31 On average, patients had 6 (IQR 3-9) coexisting conditions per hospitalization, 42.1%  
32  
33 of patients had a high degree of comorbidity (Charlson Comorbidity Index score of 2 or  
34  
35 greater), and 42.8% of patients had low comorbidity (Charlson score of 0). Hypertension  
36  
37 (37.6%) and type 2 diabetes mellitus (33.3%) were the most prevalent comorbid  
38  
39 conditions (Table 1).  
40  
41

### 42 43 Patient Outcomes and Resource Utilization

44  
45 Among all GIM hospitalizations, 9.9% involved admission to ICU, 6.5% resulted in  
46  
47 death in hospital, and 10.9% resulted in readmission to GIM within 30 days of discharge  
48  
49 (Table 2). The median total cost per hospitalization was \$5,850 (IQR \$3,915-10,061,  
50  
51 Table 3). The median acute length-of-stay was 4.6 days (IQR 2.5-8.6). Patients were  
52  
53 designated ALC in 12.4% of hospitalizations and ALC days represented 22.0% of all  
54  
55  
56  
57  
58  
59  
60

1  
2  
3 GIM bed-days. At hospital discharge, 70.8% of patients returned home whereas 18.9%  
4  
5 were transferred to a nursing home or rehabilitation facility.  
6

7  
8 Patients received at least one CT scan in 52.2% of hospitalizations, ultrasonography  
9  
10 in 29.9%, MRI in 11.7%, an interventional radiology procedure in 10.0%, at least one  
11  
12 red blood cell transfusion in 9.2%, endoscopy or bronchoscopy in 10.2%, and dialysis in  
13  
14 1.8% (Table 4).  
15

16  
17 Hospitalizations to GIM accounted for 17.4% of all hospital admissions, 38.8% of all  
18  
19 emergency admissions, and 23.7% of all hospital bed-days.  
20

### 21 Time Trends in Resource Utilization and Patient Characteristics in GIM

22  
23 The number of GIM hospitalizations increased annually from 23,475 to 31,078,  
24  
25 representing a 32.4% increase over a five-year period (Figure 1). Over this time, the  
26  
27 proportion of all hospital patients cared for by GIM increased by between 10.4% and  
28  
29 28.7% at every hospital except for one, where the GIM proportion decreased by 19.9%.  
30  
31 There was no meaningful change over time in the median length-of-stay (4.6 days in  
32  
33 both the first and last study year) or median cost (\$5,808 to \$5,813). There was a small  
34  
35 increase in 30-day readmission to GIM from 10.5% to 11.3% and there was a 3.6%  
36  
37 reduction in the proportion of patients receiving at least one advanced imaging test  
38  
39 (66.9% to 63.3%). There was no meaningful change in patient age, sex, comorbidity  
40  
41 score, or number of coexisting medical conditions over the study duration (Appendix  
42  
43 Table 2).  
44  
45  
46  
47  
48

### 49 Prevalent Discharge Diagnoses

50  
51 The most common discharge CMGs were pneumonia (5.0%), heart failure (4.7%),  
52  
53 chronic obstructive pulmonary disease (COPD, 4.1%), urinary tract infection (UTI,  
54  
55  
56  
57  
58  
59  
60

1  
2  
3 4.0%), and stroke not including transient ischemic attack (3.6%). Compared with other  
4  
5 validated cohort definitions. the specificity of the CIHI CMGs for all of these conditions  
6  
7 was >99.9% and the sensitivity ranged from 80.4 to 99.2% (Appendix Table 3).  
8  
9

10 The ten most common CMGs accounted for only 33.0% of all hospitalizations to GIM  
11  
12 and the remainder included 439 different CMGs (Figure 2).  
13  
14

### 15 Characteristics of Most Common Case Mix Groups

16

17 Patient characteristics, outcomes, and resource utilization for the most common  
18  
19 conditions are presented in Tables 2, 3, and 4. There were high levels of multimorbidity  
20  
21 among patients with all of the most prevalent diagnoses, ranging from a median of 5 to  
22  
23 7 coexisting conditions (IQR 3-10). ICU utilization and death-in-hospital was highest  
24  
25 among patients with stroke (14.5% and 8.3%, respectively) and lowest among patients  
26  
27 with UTI (5.3% and 2.7%, respectively). Patients with COPD had high levels of ICU  
28  
29 utilization (12.6%) but relatively lower rates of death (5.3%).  
30  
31  
32  
33

34 Patients with stroke had the highest rates of being designated ALC (24.4%), the  
35  
36 longest average acute length-of-stay (6.4 days, IQR 3.9-10.4), and the highest average  
37  
38 cost per hospitalization (\$6915, IQR 5,584-11,455). There was marked variation in  
39  
40 patient age, comorbidity, length-of-stay, and cost among all diagnoses (Tables 2 and 3).  
41  
42  
43  
44

### 45 **Interpretation**

46

47 GEMINI is the largest study of GIM hospital care conducted in Canada. We described  
48  
49 patient characteristics, resource utilization, and patient outcomes for more than 135,000  
50  
51 hospitalizations at 5 academic and 2 community hospital sites in the Greater Toronto  
52  
53 Area. GIM hospitalizations accounted for 38.8% of emergency admissions and 23.7% of  
54  
55  
56  
57  
58  
59  
60

1  
2  
3 all hospital bed days and the number of GIM hospitalizations grew by 32.4% between  
4  
5 2010 and 2015. Although the most prevalent conditions in GIM (COPD, pneumonia,  
6  
7 heart failure, and stroke) are among the most costly causes of hospitalization in  
8  
9 Canada,(25) the ten most common conditions accounted for fewer than one-third of all  
10  
11 GIM hospitalizations. Our findings emphasize the importance of considering hospital  
12  
13 GIM care as a whole for research and quality improvement efforts because disease-  
14  
15 specific approaches will neglect the majority of patients. Broader metrics of quality and  
16  
17 outcomes are urgently needed that can be applied across diseases, including patient-  
18  
19 reported health and functional outcomes and other experience measures.(26)  
20  
21  
22  
23

24 Our findings are generally consistent with other studies that have been conducted in  
25  
26 GIM patient populations. In 2 studies, each involving approximately 10,000 patients at 7  
27  
28 teaching hospitals in Alberta, the most prevalent discharge diagnoses were COPD,  
29  
30 pneumonia, heart failure, UTI, and venous thromboembolism and in-hospital mortality  
31  
32 ranged from 3.9-7.4% across hospitals.(27,28) The median length-of-stay in our study  
33  
34 was 4.6 days, which is similar to studies in the US and Europe, in which the median  
35  
36 length-of-stay in GIM patients was 4.0.(29,30) GIM hospital patients are often  
37  
38 considered to be elderly and highly multimorbid(31) and in our study the median age  
39  
40 was 73 years with 6 coexisting conditions on average. However, one of our most  
41  
42 striking findings was the marked heterogeneity of this patient population. Nearly 30% of  
43  
44 the population was under 60 years of age whereas nearly 40% were over 80.  
45  
46 Approximately 40% had a low comorbidity score whereas nearly 45% had high  
47  
48 comorbidity. There was dramatic variability in length-of-stay and resource utilization  
49  
50 among hospitalizations for the same diagnosis. For example, the median length of stay  
51  
52  
53  
54  
55  
56  
57  
58  
59  
60

1  
2  
3 for patients with heart failure was 5.6 days but the 25<sup>th</sup> and 75<sup>th</sup> percentile were 3.1 and  
4  
5 9.7 days. Thus, GIM patients are highly variable in terms of individual characteristics,  
6  
7 the conditions that lead to hospitalization, and resource utilization and outcomes within  
8  
9 each condition. The reasons for variability should be a major focus of research for this  
10  
11 patient population, which is poorly represented by “average” measures.  
12  
13  
14

15 We highlight several interesting trends over time. Despite the substantially increased  
16  
17 number of GIM hospitalizations, and an increase in the proportion of hospital patients  
18  
19 cared for by GIM at most sites, there was no meaningful change in the average cost of  
20  
21 hospitalization or length-of-stay. There was a small increase in 30-day readmissions to  
22  
23 GIM and a reduction in the proportion of patients receiving imaging tests. It appears that  
24  
25 GIM services have been able to accommodate increased volume without major  
26  
27 changes in patient outcomes or resource utilization. There were no major changes in  
28  
29 basic patient characteristics and thus further work is needed to understand the drivers  
30  
31 of changes in resource utilization over time.  
32  
33  
34  
35

36 Our study has several strengths. We identified patients cared for by GIM services by  
37  
38 collecting hospital-level data. Studies using centrally-collected administrative data often  
39  
40 include patients cared for by both general medical services and subspecialists or they  
41  
42 identify patients with specific diagnoses and are thus unable to capture the true scope  
43  
44 of GIM. This is an important advantage of our study design as GIM wards are a  
45  
46 functional unit for care delivery and represent an important target for quality  
47  
48 improvement initiatives. The GEMINI study also demonstrates the feasibility of  
49  
50 electronic data extraction across multiple hospitals, each with its own electronic medical  
51  
52 record and information technology infrastructure. The marked heterogeneity of the GIM  
53  
54  
55  
56  
57  
58  
59  
60

1  
2  
3 patient population highlights the importance of comprehensively capturing a breadth of  
4 data about all patients and the importance of a large sample. This was made possible  
5 by extraction of electronic clinical data.  
6  
7  
8  
9

10 One limitation of this study is the use of ICD-10-CA discharge diagnoses to define  
11 disease states. The CIHI databases require a single disease to be listed as the most  
12 responsible diagnosis. This presents an important limitation in cases where conditions  
13 coexist or overlap, such as the comorbid complex of heart failure and pneumonia in  
14 patients presenting with dyspnea. Second, we used only the diagnoses coded for each  
15 hospitalization to calculate the Charlson comorbidity score, which could underestimate  
16 the degree of comorbidity. Third, our study was conducted in 7 teaching hospitals in  
17 Canada's largest metropolitan area. Our patient sample is broadly similar to other  
18 studies in GIM in Canada, the US, and Europe(27–30) and is likely generalizable to  
19 other urban and suburban academic health centres and large community hospitals, but  
20 may not be representative of patients or practices in other settings. Third, we were only  
21 able to capture readmission to GIM at hospitals within our network. We did not capture  
22 admissions to other medical services or hospitals outside the network. Finally, data  
23 collection was limited to those elements that were readily available in electronic clinical  
24 data and administrative data. Thus, we are unable to report important information such  
25 as patient socioeconomic factors, functional status and frailty, caregiver support, or  
26 advanced care planning. There is an opportunity for hospitals to standardize data  
27 collection around these important factors, given their importance in determining patient  
28 outcomes.  
29  
30  
31  
32  
33  
34  
35  
36  
37  
38  
39  
40  
41  
42  
43  
44  
45  
46  
47  
48  
49  
50  
51  
52  
53

## 54 55 **Conclusion** 56 57 58 59 60



1  
2  
3 GIM hospital patients represent a large and growing population that consumes  
4  
5 substantial hospital resources. This population is characterized by marked  
6  
7  
8 heterogeneity and there are substantial opportunities to develop broad measures of  
9  
10 quality care for this population, to study variations in care and outcomes, and to improve  
11  
12 the quality of care. Electronic data collection and linkage can support multicentre  
13  
14 research to study this complex population. Advancing our understanding of GIM  
15  
16 patients is essential for promoting a high quality, sustainable healthcare system.  
17  
18  
19  
20  
21  
22  
23  
24  
25  
26  
27  
28  
29  
30  
31  
32  
33  
34  
35  
36  
37  
38  
39  
40  
41  
42  
43  
44  
45  
46  
47  
48  
49  
50  
51  
52  
53  
54  
55  
56  
57  
58  
59  
60

Confidential

## References

1. Canadian Institute for Health Information. National Health Expenditure Trends, 1975 to 2016. Canadian Institute for Health Information Report. Ottawa, ON; 2016.
2. Kuo Y-F, Sharma G, Freeman JL, Goodwin JS. Growth in the care of older patients by hospitalists in the United States. *N Engl J Med*. 2009;360(11):1102–12.
3. Soong C, Fan E, Howell EE, Maloney RJ, Pronovost PJ, Wilton D, et al. Characteristics of hospitalists and hospitalist programs in the united states and canada. *J Clin Outcomes Manag*. 2009;16(2):69–74.
4. Uijen AA, van de Lisdonk EH. Multimorbidity in primary care: Prevalence and trend over the last 20 years. *Eur J Gen Pract [Internet]*. 2008 Jan 11;14(sup1):28–32. Available from:  
<http://www.tandfonline.com/doi/full/10.1080/13814780802436093>
5. Tinetti ME, Fried TR, Boyd CM. Designing Health Care for the Most Common Chronic Condition—Multimorbidity. *JAMA [Internet]*. 2012 Jun 20;307(23):1160–2. Available from:  
<http://jama.jamanetwork.com/article.aspx?doi=10.1001/jama.2012.5265>
6. Tsugawa Y, Jha AK, Newhouse JP, Zaslavsky AM, Jena AB. Variation in Physician Spending and Association With Patient Outcomes. *JAMA Intern Med [Internet]*. 2017 May 1;177(5):675. Available from:  
<http://archinte.jamanetwork.com/article.aspx?doi=10.1001/jamainternmed.2017.0059>

- 1  
2  
3 7. Rifkin WD, Holmboe E, Scherer H, Sierra H. Comparison of hospitalists and  
4 nonhospitalists in inpatient length of stay adjusting for patient and physician  
5 characteristics. *J Gen Intern Med*. 2004;19(11):1127–32.  
6  
7
- 8  
9 8. Dharmarajan K, Hsieh AF, Kulkarni VT, Lin Z, Ross JS, Horwitz LI, et al.  
10 Trajectories of risk after hospitalization for heart failure, acute myocardial  
11 infarction, or pneumonia: retrospective cohort study. *BMJ [Internet]*. 2015 Feb  
12 5;350(feb05 19):h411–h411. Available from:  
13 <http://www.bmj.com/cgi/doi/10.1136/bmj.h411>  
14  
15
- 16 9. Region of Peel. Peel Data Centre Mid-Year Population Forecasts [Internet]. [cited  
17 2017 Jan 8]. Available from:  
18 <https://www.peelregion.ca/planning/pdc/data/forecasts/population-2006-2031.htm>  
19  
20
- 21 10. City of Toronto. Toronto Facts [Internet]. [cited 2017 Jan 8]. Available from:  
22 [http://www1.toronto.ca/wps/portal/contentonly?vgnextoid=dbe867b42d853410Vgn  
23 VCM10000071d60f89RCRD&vgnnextchannel=57a12cc817453410VgnVCM10000  
24 071d60f89RCRD](http://www1.toronto.ca/wps/portal/contentonly?vgnextoid=dbe867b42d853410VgnVCM10000071d60f89RCRD&vgnnextchannel=57a12cc817453410VgnVCM10000071d60f89RCRD)  
25  
26
- 27 11. Dang QH. Secure Hash Standard [Internet]. Vol. FIPS PUB 1, Federal Information  
28 Processing Standards Publication. Gaithersburg, MD; 2015 Jul. Available from:  
29 [http://csrc.nist.gov/publications/fips/fips180-3/fips180-  
30 3\\_final.pdf](http://csrc.nist.gov/publications/fips/fips180-3/fips180-3_final.pdf)  
31 <http://thor.info.uaic.ro/~fltiplea/CC/FIPS180-3.pdf>  
32  
33
- 34 12. El Emam K. Guide to the De-Identification of Personal Health Information. Boca  
35 Raton, FL: CRC Press; 2013.  
36  
37
- 38 13. Gomes T, Martins D, Tadrous M, al et. Association of a blood glucose test strip  
39 quantity-limit policy with patient outcomes: A population-based study. *JAMA Intern*  
40  
41  
42  
43  
44  
45  
46  
47  
48  
49  
50  
51  
52  
53  
54  
55  
56  
57  
58  
59  
60

- 1  
2  
3 Med [Internet]. 2016 Nov 7; Available from:  
4  
5  
6 <http://dx.doi.org/10.1001/jamainternmed.2016.6851>  
7
- 8 14. Filion KB, Azoulay L, Platt RW, Dahl M, Dormuth CR, Clemens KK, et al. A  
9  
10 Multicenter Observational Study of Incretin-based Drugs and Heart Failure. *N*  
11  
12 *Engl J Med* [Internet]. 2016 Mar 23;374(12):1145–54. Available from:  
13  
14  
15 <http://dx.doi.org/10.1056/NEJMoa1506115>  
16
- 17 15. Bekelman JE, Halpern SD, Blankart CR, Bynum JP, Cohen J, Fowler R, et al.  
18  
19 Comparison of Site of Death, Health Care Utilization, and Hospital Expenditures  
20  
21 for Patients Dying With Cancer in 7 Developed Countries. *JAMA* [Internet]. 2016  
22  
23 Jan 19;315(3):272. Available from:  
24  
25  
26 <http://jama.jamanetwork.com/article.aspx?doi=10.1001/jama.2015.18603>  
27  
28
- 29 16. Quan H, Li B, Couris CM, Fushimi K, Graham P, Hider P, et al. Updating and  
30  
31 validating the charlson comorbidity index and score for risk adjustment in hospital  
32  
33 discharge abstracts using data from 6 countries. *Am J Epidemiol*.  
34  
35 2011;173(6):676–82.  
36  
37
- 38 17. Wodchis WP, Bushmeneva K, Nikitovic M, McKillop I. Guidelines on Person-Level  
39  
40 Costing Using Administrative Databases in Ontario. Toronto, Ontario; 2013.  
41  
42
- 43 18. Canadian Institute for Health Information. CMG+ Methodology [Internet]. 2015.  
44  
45 Available from:  
46  
47  
48 <https://secure.cihi.ca/estore/productSeries.htm?locale=en&pc=PCC358>  
49
- 50 19. Hall R, Mondor L, Porter J, Fang J, Kapral MK. Accuracy of Administrative Data  
51  
52 for the Coding of Acute Stroke and TIAs. *Can J Neurol Sci*. 2016;1–9.  
53  
54
- 55 20. Health Quality Ontario; Ministry of Health and Long-Term Care. Quality-Based  
56  
57  
58  
59  
60

- 1  
2  
3  
4  
5  
6  
7  
8  
9  
10  
11  
12  
13  
14  
15  
16  
17  
18  
19  
20  
21  
22  
23  
24  
25  
26  
27  
28  
29  
30  
31  
32  
33  
34  
35  
36  
37  
38  
39  
40  
41  
42  
43  
44  
45  
46  
47  
48  
49  
50  
51  
52  
53  
54  
55  
56  
57  
58  
59  
60
- Procedures: Clinical Handbook for Stroke. 2013;(April):62.
21. Health Quality Ontario; Ministry of Health and Long-Term Care. Quality-Based Procedures: Clinical Handbook for Community-Acquired Pneumonia. 2013;November:67. Available from: <http://www.hqontario.ca/evidence/publications-and-ohtac-recommendations/clinical-handbooks>
22. Health Quality Ontario; Ministry of Health and Long-Term Care. Quality-Based Procedures: Clinical Handbook for Congestive Heart Failure. 2013;(January):67.
23. Health Quality Ontario; Ministry of Health and Long-Term Care. Quality-Based Procedures: Clinical Handbook for Chronic Obstructive Pulmonary Disease. 2013;(January):60.
24. Kwong, J.C, Crowcroft, N.S., Campitelli, M.A.; Ratnasingham, S.; Daneman, N.; Deeks, S.L.; Manuel DG. OB of IDSG. Ontario Burden of Infectious Disease Study (ONBOIDS): An OAHPP/ICES Report [Internet]. Toronto, Ontario; 2010. Available from: [http://www.publichealthontario.ca/en/eRepository/ONBOIDS\\_EXECUTIVE\\_SUMMARY.pdf](http://www.publichealthontario.ca/en/eRepository/ONBOIDS_EXECUTIVE_SUMMARY.pdf)
25. Canadian Institute for Health Information. Leading Hospitalization Costs in Acute Inpatient Facilities in 2012-2013. 2013; Available from: [https://www.cihi.ca/en/cad\\_costingdata\\_infosheet14\\_en.pdf](https://www.cihi.ca/en/cad_costingdata_infosheet14_en.pdf)
26. Basch E. Patient-Reported Outcomes - Harnessing Patients' Voices to Improve Clinical Care. N Engl J Med [Internet]. 2017 Jan 12;376(2):105–8. Available from: <http://scholar.google.com/scholar?hl=en&btnG=Search&q=intitle:New+engla+nd+j>

- 1  
2  
3  
4  
5  
6  
7  
8  
9  
10  
11  
12  
13  
14  
15  
16  
17  
18  
19  
20  
21  
22  
23  
24  
25  
26  
27  
28  
29  
30  
31  
32  
33  
34  
35  
36  
37  
38  
39  
40  
41  
42  
43  
44  
45  
46  
47  
48  
49  
50  
51  
52  
53  
54  
55  
56  
57  
58  
59  
60
- ournal#0
27. McAlister FA, Bakal JA, Majumdar SR, Dean S, Padwal RS, Kassam N, et al. Safely and effectively reducing inpatient length of stay: a controlled study of the General Internal Medicine Care Transformation Initiative. *BMJ Qual Saf* [Internet]. 2014;23(1):446–56. Available from: <http://www.ncbi.nlm.nih.gov/pubmed/24108415>
28. McAlister FA, Youngson E, Bakal JA, Holroyd-Leduc J, Kassam N. Physician experience and outcomes among patients admitted to general internal medicine teaching wards. *Can Med Assoc J* [Internet]. 2015 Oct 6;187(14):1041–8. Available from: <http://www.cmaj.ca/cgi/doi/10.1503/cmaj.150316>
29. Ong M. House Staff Team Workload and Organization Effects on Patient Outcomes in an Academic General Internal Medicine Inpatient Service. *Arch Intern Med* [Internet]. 2007;167(1):47. Available from: <http://archinte.jamanetwork.com/article.aspx?doi=10.1001/archinte.167.1.47>
30. Kellett J, Deane B. The diagnoses and co-morbidity encountered in the hospital practice of acute internal medicine. *Eur J Intern Med*. 2007;18(6):467–73.
31. Buurman BM, Frenkel WJ, Abu-Hanna A, Parlevliet JL, de Rooij SE. Acute and chronic diseases as part of multimorbidity in acutely hospitalized older patients. *Eur J Intern Med* [Internet]. 2016 Jan;27:68–75. Available from: <file://www.sciencedirect.com/science/article/pii/S0953620515003271>

**Figure 1.** Trends in resource utilization in GIM over time

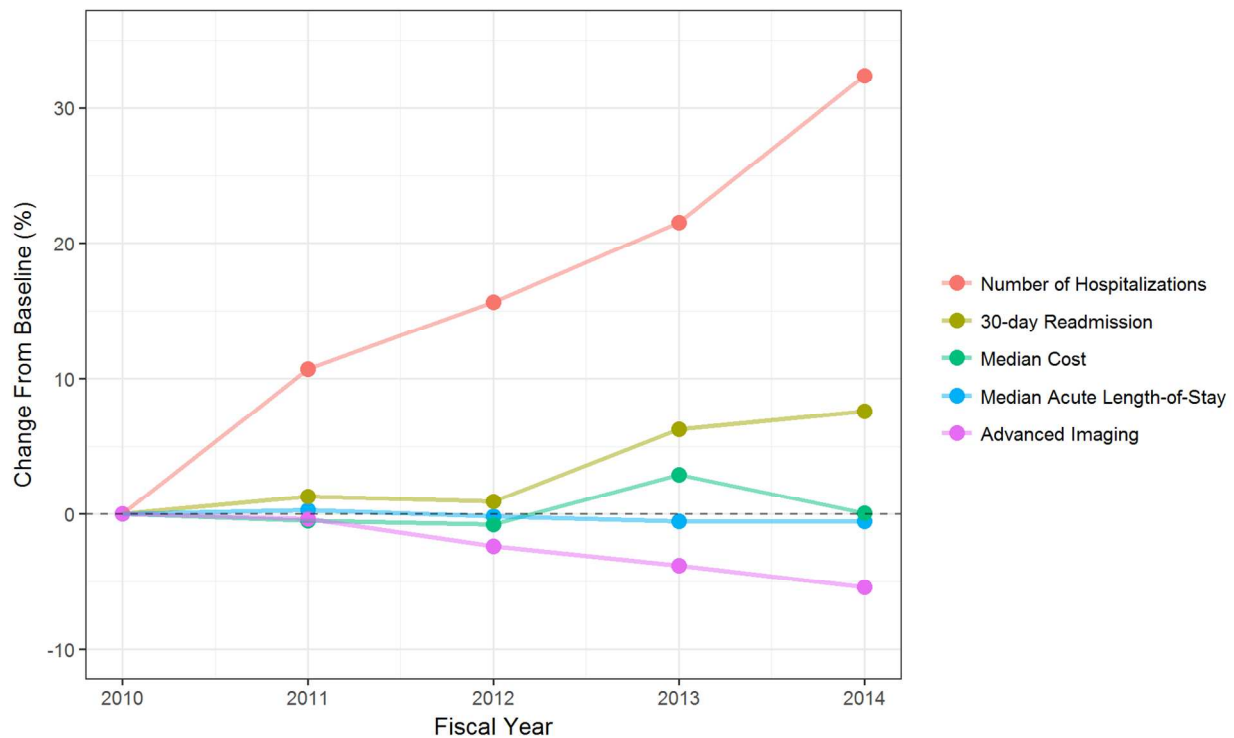

**Figure 1 Legend:** 30-day readmission represents readmission to GIM at one of the participating GEMINI hospitals within 30 days of discharge. 'Advanced Imaging' represents the proportion of patients receiving at least one ultrasound, CT scan, or MRI, as an indicator of the intensity of investigations patients receive.

**Figure 2.** Prevalence and cost of most common primary discharge conditions in GIM.

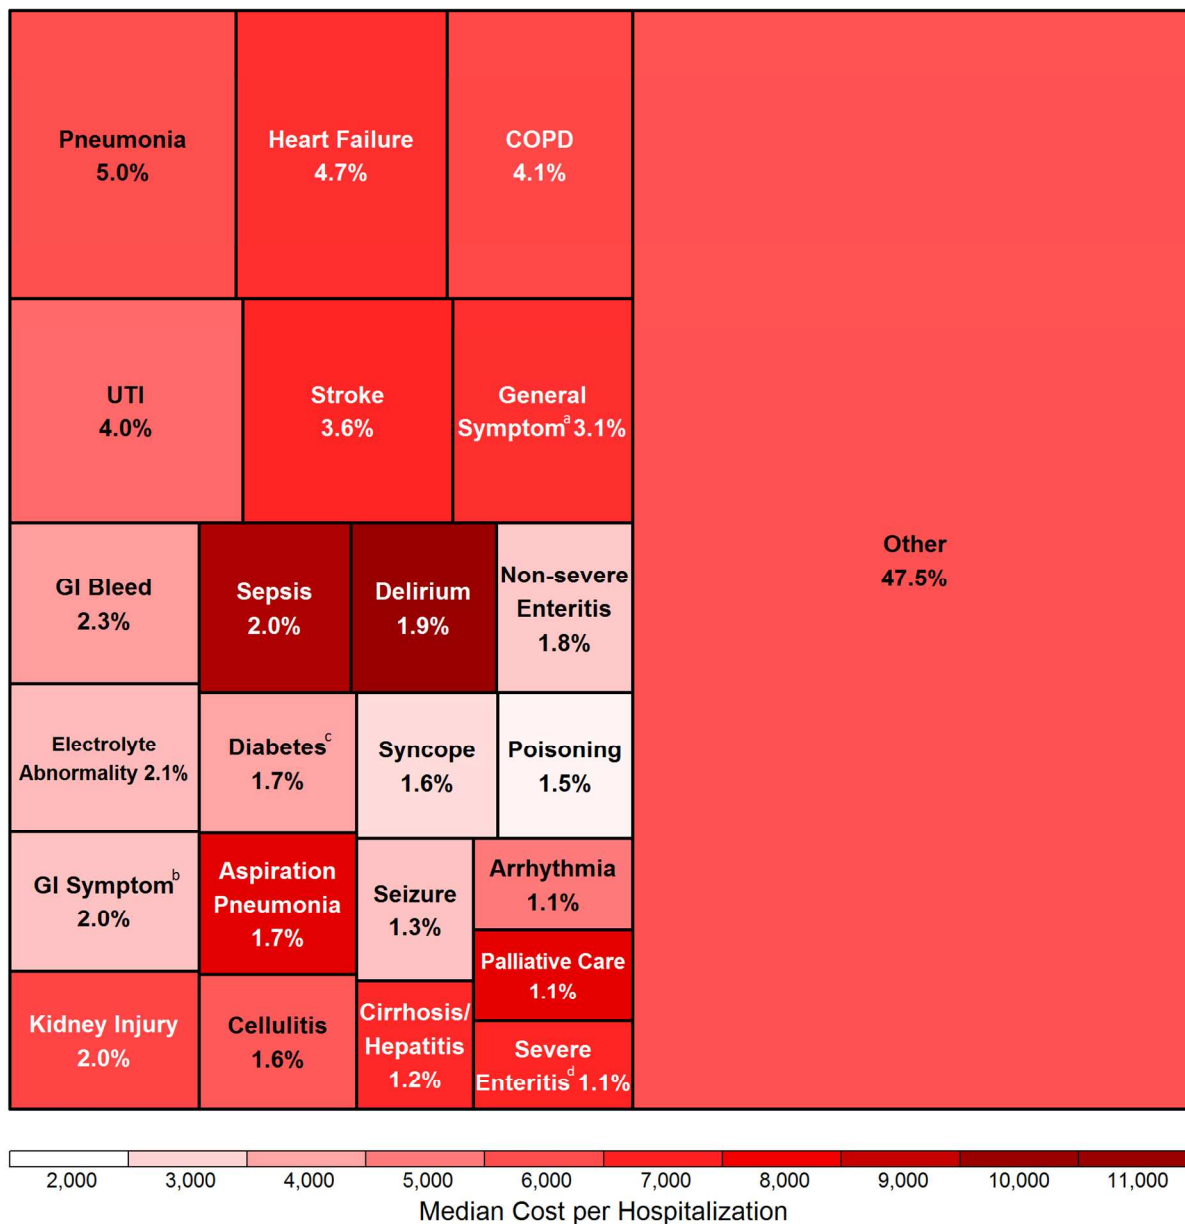

**Figure 2 Legend:** Primary discharge diagnosis was calculated using CIHI CMGs. Prevalence is denoted by the size of each box, and cost in Canadian dollars is denoted by colour. “Other” represents all remaining CMGs in general medicine, and is comprised of 426 additional diagnoses. For clarity of presentation in this figure, we simplified the description of certain CMGs: a) e.g. falls, cachexia, and fatigue; b) e.g. abdominal pain, constipation, vomiting; c) e.g. diabetic ketoacidosis, hyperglycemia, hypoglycemia; d) e.g. *C. difficile*-associated diarrhea, ischemic bowel. GI: Gastrointestinal; COPD: Chronic Obstructive Pulmonary Disease; UTI: Urinary Tract Infection.



**Table 1.** Patient characteristics in the GEMINI study cohort.

| Characteristic                          | GEMINI Cohort<br>N=136,208 |
|-----------------------------------------|----------------------------|
| Age (years) - Median (IQR)              | 73 (57, 84)                |
| Categories – N (%)                      |                            |
| < 60                                    | 39004 (28.6)               |
| 60-80                                   | 46039 (33.8)               |
| >80                                     | 51165 (37.6)               |
| Sex (female) – N (%)                    | 68971 (50.6%)              |
| Number comorbidities – Median (IQR)     | 6 (3, 9)                   |
| Charlson Index – N (%)                  |                            |
| 0                                       | 58257 (42.8%)              |
| 1                                       | 20620 (15.1%)              |
| 2+                                      | 57331 (42.1%)              |
| Most Common Comorbid Conditions – N (%) |                            |
| Hypertension                            | 51204 (37.6)               |
| Type 2 Diabetes Mellitus                | 45376 (33.3)               |
| Atrial Fibrillation and Flutter         | 19947 (14.6)               |
| Dyslipidemia                            | 19518 (14.3)               |
| Electrolyte Abnormality                 | 19113 (14.0)               |
| Heart Failure                           | 18736 (13.8)               |
| Discharge Disposition – N (%)           |                            |
| Home                                    | 96414 (70.8)               |
| Nursing Home or Rehabilitation          | 25804 (18.9)               |
| Death                                   | 8916 (6.5)                 |
| Discharge Against Medical Advice        | 2543 (1.9)                 |
| Other Acute Care Hospital Other         | 1841 (1.4)                 |
| Other                                   | 690 (0.5)                  |

**Table 2.** Patient characteristics and outcomes among most prevalent conditions in GIM.

|                             | Total Cohort  | Pneumonia   | Heart Failure | COPD        | UTI         | Stroke      |
|-----------------------------|---------------|-------------|---------------|-------------|-------------|-------------|
| Total N (% of Total Cohort) | 136,208 (100) | 6,804 (5.0) | 6,341 (4.7)   | 5,574 (4.1) | 5,466 (4.0) | 4,912 (3.6) |
| Age (median, IQR)           | 73 (57, 84)   | 80 (64, 87) | 83 (75, 88)   | 77 (66, 84) | 80 (69, 87) | 76 (64, 84) |
| Comorbidities (median, IQR) | 6 (3, 9)      | 5 (3, 8)    | 7 (5, 10)     | 6 (3, 8)    | 6 (4, 9)    | 5 (3, 7)    |
| ICU Utilization* (N, %)     | 10,031 (9.9)  | 460 (8.6)   | 409 (8.0)     | 589 (12.6)  | 185 (5.3)   | 337 (14.5)  |
| Death in Hospital (N, %)    | 8,916 (6.5)   | 534 (7.8)   | 491 (7.7)     | 293 (5.3)   | 150 (2.7)   | 410 (8.3)   |
| 30-day Readmission^ (N, %)  | 14,387 (10.9) | 620 (9.4)   | 990 (16.1)    | 893 (16.5)  | 663 (12.4)  | 268 (5.7)   |

**Table 2 Legend:** The most prevalent conditions in GIM were identified using CIHI CMGs. \*ICU utilization does not include 34,453 patients at Trillium Health Partners, for which data were not available at the time of submission. ^30-day readmission represents readmission to GIM at one of the participating GEMINI hospitals within 30 days of discharge. COPD: Chronic Obstructive Pulmonary Disease; UTI: Urinary Tract Infection; ICU: Intensive care or step-up unit.

**Table 3.** Resource utilization among most prevalent conditions in GIM.

|                                    | Total Cohort          | Pneumonia            | Heart Failure        | COPD                 | UTI                  | Stroke                |
|------------------------------------|-----------------------|----------------------|----------------------|----------------------|----------------------|-----------------------|
| Cost* (CAD, median, IQR)           | 5,850 (3,915, 10,061) | 5,935 (4,343, 8,068) | 6,706 (4,956, 9,403) | 6,148 (4,459, 8,741) | 5,391 (3,981, 7,140) | 6,915 (5,584, 11,455) |
| Length-of-stay (days, median, IQR) | 4.6 (2.5, 8.6)        | 4.5 (2.5, 7.7)       | 5.6 (3.1, 9.7)       | 4.4 (2.5, 7.5)       | 4.4 (2.7, 6.9)       | 6.4 (3.9, 10.4)       |
| Bed-Days (N, % of total cohort)    | 1,310,717 (100.0)     | 50,059 (3.8)         | 56,799 (4.3)         | 39,159 (3.0)         | 39,552 (3.0)         | 64,550 (4.9)          |
| ALC Designation (N, %)             | 16,868 (12.4)         | 567 (8.3)            | 614 (9.7)            | 434 (7.8)            | 609 (11.1)           | 1,197 (24.4)          |
| ALC Days (N, % of total ALC days)  | 288,250 (100.0)       | 6,713 (2.3)          | 7,585 (2.6)          | 4,949 (1.7)          | 7,531 (2.6)          | 19,075 (6.6)          |

**Table 3 Legend:** The most prevalent conditions in GIM were identified using CIHI CMGs. \*48 hospitalizations with missing cost data were excluded. ALC: Alternate Level of Care; COPD: Chronic Obstructive Pulmonary Disease; UTI: Urinary Tract Infection.

**Table 4.** Use of diagnostic and therapeutic services among most prevalent conditions in GIM.

| Diagnosis                         | Total Cohort  | Pneumonia    | Heart Failure | COPD         | UTI          | Stroke       |
|-----------------------------------|---------------|--------------|---------------|--------------|--------------|--------------|
| X-ray (N, %)                      | 84,481 (83.0) | 5,918 (98.6) | 5,557 (99.0)  | 4,999 (98.5) | 3,750 (87.3) | 1,946 (65.7) |
| CT (N, %)                         | 53,125 (52.2) | 2,608 (43.4) | 1,629 (29.0)  | 1,709 (33.7) | 2,007 (46.7) | 2,879 (97.3) |
| Ultrasound (N, %)                 | 34,577 (29.9) | 1,172 (19.5) | 1,821 (32.4)  | 879 (17.3)   | 1,637 (38.1) | 1,354 (45.7) |
| MRI (N, %)                        | 13,481 (11.7) | 132 (2.2)    | 79 (1.4)      | 57 (1.1)     | 142 (3.3)    | 1,885 (63.7) |
| Interventional Radiology (N, %)   | 11,577 (10.0) | 270 (4.5)    | 214 (3.8)     | 143 (2.8)    | 335 (7.8)    | 170 (5.7)    |
| Red Blood Cell Transfusion (N, %) | 9,325 (9.2)   | 213 (4.0)    | 243 (4.8)     | 105 (2.3)    | 114 (3.3)    | 55 (2.4)     |
| Endoscopy or Bronchoscopy (N, %)  | 13,832 (10.2) | 360 (5.3)    | 169 (2.7)     | 182 (3.3)    | 101 (1.8)    | 139 (2.8)    |
| Dialysis (N, %)                   | 2,448 (1.8)   | 130 (1.9)    | 91 (1.4)      | 44 (0.8)     | 41 (0.8)     | 36 (0.7)     |

**Table 4 Legend:** The most prevalent conditions in GIM were identified using CIHI CMGs. N = number of hospitalizations with at least one of this test or treatment. Radiology data were not available from 20,693 patients at Trillium Health Partners and transfusion data were not available for 34,453 patients at Trillium Health Partners. COPD: Chronic Obstructive Pulmonary Disease; CT: Computed Tomography; MRI: Magnetic Resonance Imaging; UTI: Urinary Tract Infection.

**Appendix Methods 1.** Identifying patients cared for by GIM.

We identified patients cared for by GIM based on their admitting service as documented at each hospital except Trillium Health Partners where admitting service was not recorded by the hospital. At Trillium Health Partners, patients were included in the cohort if a physician who attends on the GIM service was their ‘most responsible physician’, which is defined by the Canadian Institute for Health Information (CIHI) as, the “physician who is responsible for the care and treatment of the patient for the majority of the visit”.<sup>14</sup> To address possible inaccuracies in the admitting service codes, we manually reviewed the list of physicians and included only patients who were admitted or discharged by a physician who attends on the GIM service.

Confidential

**Appendix Methods 2.** Structure of General Internal Medicine Services at GEMINI hospitals

St. Michael's Hospital

- Clinical Teaching Unit – 4 Teams
- Hospitalist Service – 1 Team
- General Internists are the attending physicians on all teams

University Health Network - Toronto General Hospital

- Clinical Teaching Unit – 4 Teams
- Hospitalist Service – 1 Team
- Internal Medicine Cancer Service – 1 Team (started in September 2014)
- General Internists and subspecialists in other areas of Internal Medicine are the attending physicians on all teams

University Health Network - Toronto Western Hospital

- Clinical Teaching Unit – 4 Teams
- Hospitalist Service – 1 Team
- Family Medicine Hospitalist Service – 1 Team
- General Internists and subspecialists in other areas of Internal Medicine are the attending physicians on all teams except for the family medicine hospitalist service, which is run by family physicians.

Sinai Health System

- Clinical Teaching Unit – 4 Teams
- General Internists, subspecialists in other areas of Internal Medicine, and one family physician-hospitalist are the attending physicians on all teams

Sunnybrook Health Sciences Centre

- Clinical Teaching Unit – 4 Teams
- Short Stay Unit – 1 Team
- Hospitalist Service – 1 Team
- General Internists and subspecialists in other areas of Internal Medicine are the attending physicians on all teams

Trillium Health Partners - Credit Valley Hospital

- Clinical Teaching Unit – 2 Teams
- Hospitalist Service (GIM) – 3 additional teams
- Hospitalist Service (Family Medicine) – 4 teams
- Clinical Teaching Unit and Hospitalist Service (GIM) teams are staffed by general internists and subspecialists in other areas of Internal Medicine. Hospitalist

1  
2  
3 (family medicine) teams are staffed by family medicine hospitalist physicians and  
4 include the Family Medicine Teaching Unit.  
5  
6

7 Trillium Health Partners - Mississauga Hospital

- 8  
9  
10  
11  
12  
13  
14  
15  
16  
17  
18  
19  
20  
21  
22  
23  
24  
25  
26  
27  
28  
29  
30  
31  
32  
33  
34  
35  
36  
37  
38  
39  
40  
41  
42  
43  
44  
45  
46  
47  
48  
49  
50  
51  
52  
53  
54  
55  
56  
57  
58  
59  
60
- Clinical Teaching Unit – 2 Teams
  - Hospitalist Service (GIM) – variable (2 intake teams per week with other teams continuing to care for admitted patients; maximum of 16 teams in operation at a time)
  - General Internists attend on both Clinical Teaching Unit and Hospitalist teams. A small number of Internal Medicine subspecialists attend on Clinical Teaching Unit teams. Data for GEMINI was collected only for General Internists because for subspecialists it was not possible to distinguish between their patients cared for on subspecialty services and general medicine services.

Confidential

1  
2  
3 **Appendix Methods 3.** Determining the proportion of hospital resources used by GIM.  
4

5 To determine the proportion of hospital resources that were used by GIM patients, we  
6 compared the number of hospitalizations, admissions to hospital from the emergency  
7 department (which we refer to as 'emergency admissions'), and total bed-days for  
8 patients in the GEMINI cohort to overall hospital values.  
9

10  
11 Data regarding total hospital utilization were obtained from the decision support  
12 department at each hospital. For the two hospital sites at Trillium Health Partners, this  
13 data could only be obtained for April 1, 2012 to March 31, 2015 (excluding the first two  
14 years of the study) because the hospital underwent a merger at that time. For Mount  
15 Sinai Hospital, data were unavailable for the fourth quarter of fiscal year 2011.  
16 Therefore, we excluded all of 2011 data from Mount Sinai Hospital for this calculation.  
17  
18  
19  
20  
21  
22  
23  
24  
25  
26  
27  
28  
29  
30  
31  
32  
33  
34  
35  
36  
37  
38  
39  
40  
41  
42  
43  
44  
45  
46  
47  
48  
49  
50  
51  
52  
53  
54  
55  
56  
57  
58  
59  
60

Confidential



**Appendix Figure 1.** GEMINI cohort study data collection schematic.

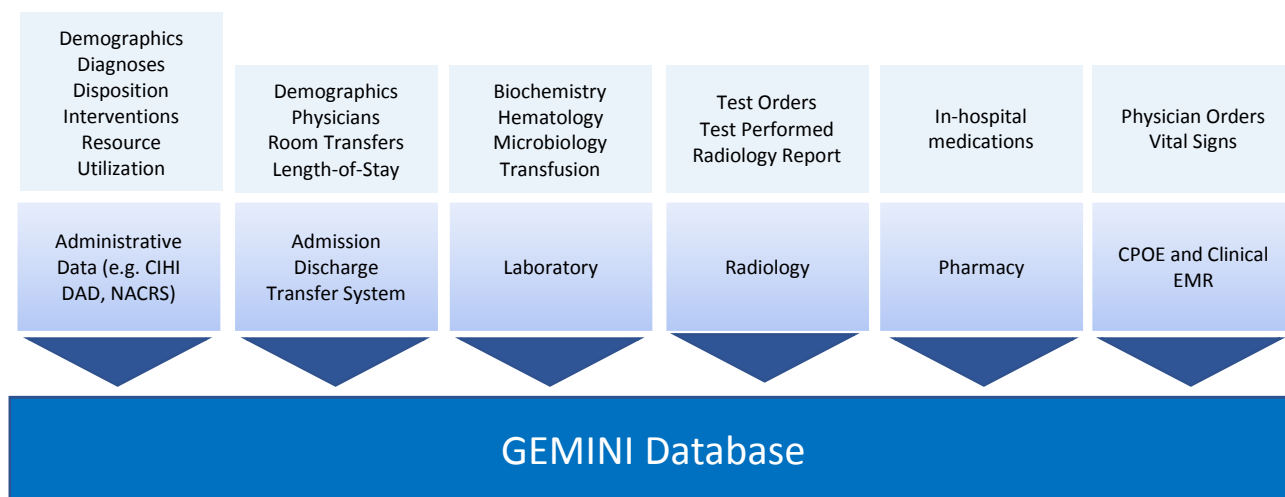

Confidential

1  
2  
3  
4  
5  
6  
7  
8  
9  
10  
11  
12  
13  
14  
15  
16  
17  
18  
19  
20  
21  
22  
23  
24  
25  
26  
27  
28  
29  
30  
31  
32  
33  
34  
35  
36  
37  
38  
39  
40  
41  
42  
43  
44  
45  
46  
47  
48  
49  
50  
51  
52  
53  
54  
55  
56  
57  
58  
59  
60

**Appendix Figure 2.** Distribution of age, number of comorbidities, length-of-stay, and cost in the GEMINI cohort.

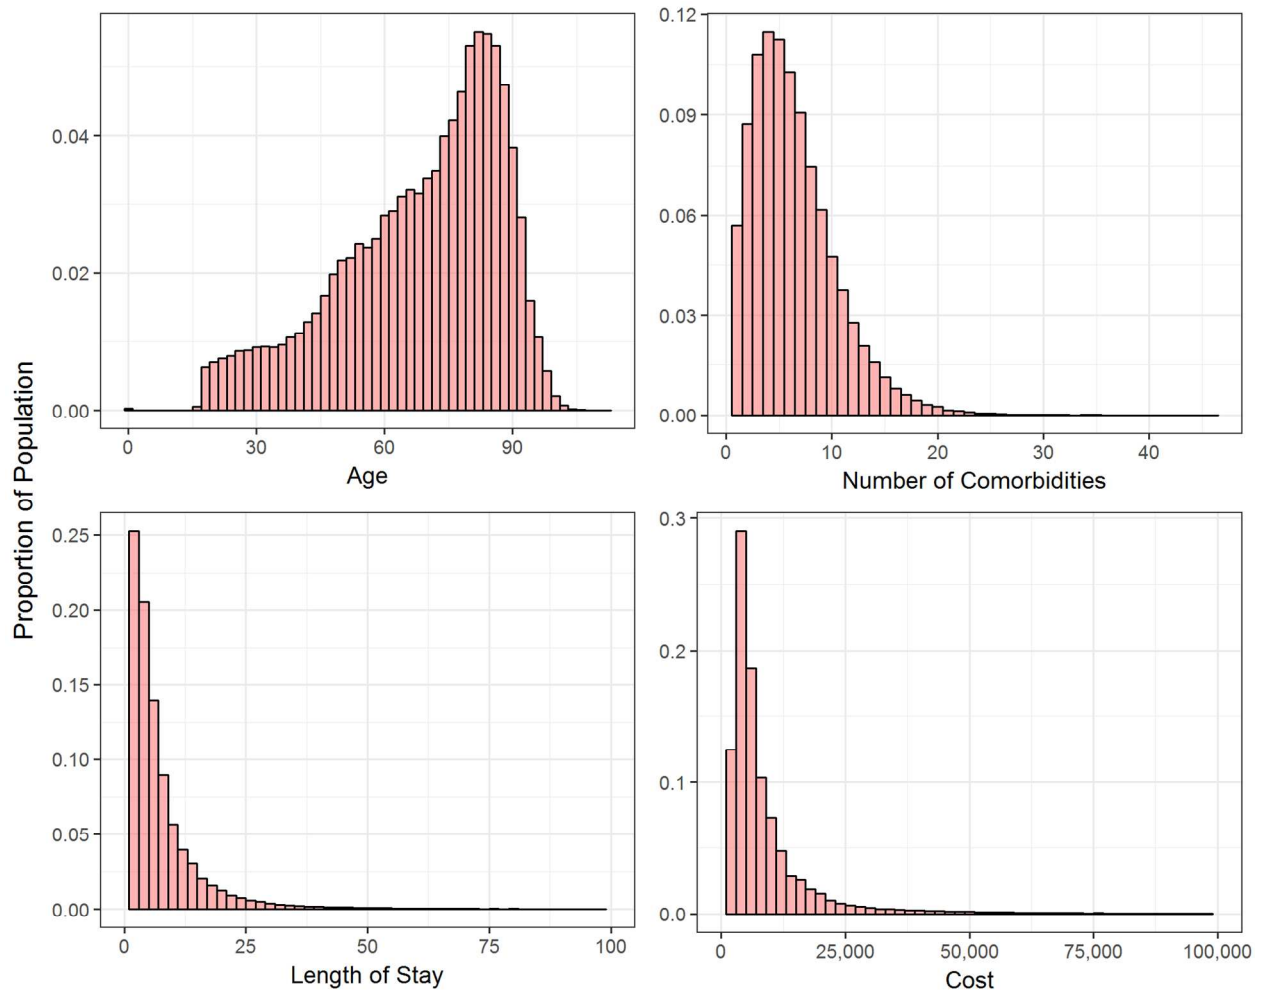

**Appendix Figure 2 Legend:** Age is expressed in years, length-of-stay in days, and cost in Canadian dollars. The length-of-stay and cost figures have had the x-axis truncated. For length-of-stay, 276 cases had a length-of-stay between 100 and 1,653 days. For cost, 1,240 cases had a cost between \$100,000 and \$2,443,417.

**Appendix Table 1.** Data availability for each GEMINI site.

| Data Source                                                                                          | SMH       | UHN –<br>TGH/TWH       | MSH                    | SBK           | THP – CVH/M            |
|------------------------------------------------------------------------------------------------------|-----------|------------------------|------------------------|---------------|------------------------|
| CIHI DAD/NACRS                                                                                       | Available | Available              | Available              | Available     | Available              |
| In-Hospital Transfers                                                                                | Available | Available              | Available              | Available     | Not Available          |
| Case Cost                                                                                            | Available | Available              | Available              | Available     | Available              |
| Cardiology ECG and Echo                                                                              | Available | Partially<br>Available | Partially<br>Available | Available     | Partially<br>Available |
| Microbiology                                                                                         | Available | Available              | Available              | Available     | Available              |
| Biochemistry/Hematology                                                                              | Available | Available              | Available              | Available     | Available              |
| Blood Transfusions                                                                                   | Available | Available              | Available              | Available     | Available              |
| Pharmacy                                                                                             | Available | Available              | Available              | Available     | Available              |
| Radiology                                                                                            | Available | Available              | Available              | Available     | Available              |
| Vital Signs                                                                                          | Available | Not Available          | Available              | Not Available | Available              |
| Clinical Documentation (Diet<br>Orders, Confusion Assessment<br>Method Score, Pain Score,<br>Weight) | Available | Not Available          | Available              | Not Available | Partially<br>Available |

**Appendix Table 2.** Overall trends in GIM by fiscal year.

|                                                                      | 2010-11                     | 2011-12                     | 2012-13                     | 2013-14                     | 2014-15                    |
|----------------------------------------------------------------------|-----------------------------|-----------------------------|-----------------------------|-----------------------------|----------------------------|
| Number of hospitalizations                                           | 23,475                      | 25,988                      | 27,140                      | 28,527                      | 31,078                     |
| Length-of-stay (days – median, 25%, 75%)                             | 4.6<br>(2.5, 8.6)           | 4.7<br>(2.5, 8.8)           | 4.6<br>(2.5, 8.6)           | 4.6<br>(2.5, 8.6)           | 4.6<br>(2.5, 8.5)          |
| 30-day Readmission* (N, %)                                           | 2,440<br>(10.5)             | 2,739<br>(10.7)             | 2,856<br>(10.6)             | 3,160<br>(11.2)             | 3,192<br>(11.3)            |
| Cost (median, 25%, 75%)                                              | 5,808<br>(3,888,<br>10,128) | 5,779<br>(3,857,<br>10,095) | 5,762<br>(3,898,<br>10,039) | 5,977<br>(4,027,<br>10,255) | 5,813<br>(3,914,<br>9,824) |
| Patients receiving at least 1 of: Ultrasound, CT scan, or MRI (N, %) | 12,573<br>(66.9)            | 13,257<br>(66.7)            | 13,213<br>(65.3)            | 13,407<br>(64.4)            | 13,942<br>(63.3)           |
| Patients receiving at least 1 Ultrasound (N, %)                      | 5,791<br>(30.8)             | 6,053<br>(30.4)             | 5,707<br>(28.2)             | 5,706<br>(27.4)             | 5,636<br>(25.6)            |
| Patients receiving at least 1 CT scan (N, %)                         | 10,103<br>(53.8)            | 10,540<br>(53.0)            | 10,566<br>(52.2)            | 10,679<br>(51.3)            | 11,237<br>(51.0)           |
| Patients receiving at least 1 MRI (N, %)                             | 2,357<br>(12.5)             | 2,398<br>(12.1)             | 2,221<br>(11.0)             | 2,254<br>(10.8)             | 2,419<br>(11.0)            |
| Age (years)                                                          | 68.8                        | 68.7                        | 68.6                        | 68.5                        | 69.0                       |
| Sex Female (N, %)                                                    | 50.2                        | 51.0                        | 50.7                        | 50.2                        | 51.0                       |
| High Comorbidity^ (N, %)                                             | 9,759<br>(41.6)             | 10,766<br>(41.4)            | 11,408<br>(42.0)            | 12,323<br>(43.2)            | 13,075<br>(42.1)           |
| Number of Coexisting Conditions (N)                                  | 6.4                         | 6.3                         | 6.5                         | 6.6                         | 6.4                        |

**Appendix Table 2 Legend:** \*30-day readmission represents readmission to GIM at one of the participating GEMINI hospitals within 30 days of discharge. ^High comorbidity was defined as a Charlson score of 2 or greater. There were 48 hospitalizations with missing cost data and they were excluded from the analysis of cost. Radiology data were unavailable for 20,693 patients from Trillium Health Partners at the time of submission.

**Appendix Table 3:** Comparison of CIHI Case Mix Groups with validated cohort definitions using combinations of ICD-10-CA codes.

| Cohort        | CMG Group | Number of Hospitalizations | Validated Cohort Definition ICD-10-CA Codes                           | Number Of Hospitalizations | Sensitivity (%) | Specificity (%) |
|---------------|-----------|----------------------------|-----------------------------------------------------------------------|----------------------------|-----------------|-----------------|
| COPD          | 139       | 5574                       | J41-44 <sup>1</sup>                                                   | 5588                       | 99.23           | 99.98           |
| Pneumonia     | 138       | 6804                       | J10-18 <sup>2</sup>                                                   | 7229                       | 93.17           | 99.95           |
| Heart Failure | 196       | 6341                       | I50, I25.5., I40-I43, I11+I50, I13+I50 <sup>3</sup>                   | 6677                       | 94.64           | 99.98           |
| Stroke        | 26        | 4912                       | I63, I64, H34 <sup>4</sup>                                            | 5535                       | 88.74           | 100.00          |
| UTI           | 487       | 5466                       | N10, N12, N151, N300, N308, N309, N410, N412, N413, N510 <sup>5</sup> | 6794                       | 80.38           | 100.00          |

Legend: Sensitivity and Specificity of CIHI CMG compared with validated cohort definitions. 48 hospitalizations had missing CMG designation and were excluded from this table. CMG: Case-Mix Group. COPD: Chronic Obstructive Pulmonary Disease; UTI: Urinary Tract Infection.

**Appendix References**

- 1 Health Quality Ontario; Ministry of Health and Long-Term Care. Quality-Based Procedures: Clinical Handbook for Chronic Obstructive Pulmonary Disease. 2013; : 60.
- 2 Health Quality Ontario; Ministry of Health and Long-Term Care. Quality-Based Procedures: Clinical Handbook for Community-Acquired Pneumonia. 2013; **November**: 67.
- 3 Health Quality Ontario; Ministry of Health and Long-Term Care. Quality-Based Procedures: Clinical Handbook for Congestive Heart Failure. 2013; : 67.
- 4 Hall R, Mondor L, Porter J, Fang J, Kapral MK. Accuracy of Administrative Data for the Coding of Acute Stroke and TIAs. *Can J Neurol Sci* 2016; : 1–9.
- 5 Kwong, J.C, Crowcroft, N.S., Campitelli, M.A.; Ratnasingham, S.; Daneman, N.; Deeks, S.L.; Manuel DG. OB of IDSG. Ontario Burden of Infectious Disease Study (ONBOIDS): An OAHPP/ICES Report. Toronto, Ontario, 2010  
DOI:[http://www.oahpp.ca/resources/documents/reports/onboid/ONBoID\\_ICES\\_Report\\_ma18.pdf](http://www.oahpp.ca/resources/documents/reports/onboid/ONBoID_ICES_Report_ma18.pdf).

Confidential
